# Supplementary material
Source: PubMed Central journal article supplement (PMC10064865)
Supplement: NIHMS1879621-supplement-Supplementary_Information.pdf [file NIHMS1879621-supplement-Supplementary_Information.pdf]

## SUPPLEMENTARY INFORMATION

### SUSTAINED ENDOSOMAL RELEASE OF A NEUROKININ-1 RECEPTOR ANTAGONIST FROM NANOSTARS PROVIDES LONG-LASTING RELIEF OF CHRONIC PAIN

\*Rocco Latorre<sup>1,2</sup>, \*Paulina D. Ramírez-García<sup>3</sup>, Alan Hegron<sup>1,2</sup>, James L. Grace<sup>3</sup>, Jeffri S. Retamal<sup>3</sup>, Priyank Shenoy<sup>3</sup>, Mai Tran<sup>3</sup>, Luigi Aurelio<sup>3</sup>, Bernard Flynn<sup>3</sup>, Daniel P. Poole<sup>3</sup>, Rafael Klein-Cloud<sup>1,2</sup>, Dane D. Jensen<sup>1,4</sup>, Thomas P. Davis<sup>5</sup>, Brian L. Schmidt<sup>1,2,4</sup>, John F. Quinn<sup>3</sup>, Michael R. Whittaker<sup>3</sup>, Nicholas A. Veldhuis<sup>3</sup>, Nigel W. Bunnett<sup>1,2</sup>

<sup>1</sup>Department of Molecular Pathobiology, New York University, New York 10010, USA

<sup>2</sup>Department of Neuroscience and Physiology, Neuroscience Institute, New York University, New York 10010, USA

<sup>3</sup>Monash Institute of Pharmaceutical Sciences, Monash University, Parkville, VIC 3052, Australia

<sup>4</sup>Bluestone Center for Clinical Research, New York University College of Dentistry, New York 10010, USA

<sup>5</sup>Australian Institute for Bioengineering and Nanotechnology, The University of Queensland, Brisbane, QLD 4072, Australia

\* Equal first authors

Correspondence:

Nigel W. Bunnett, Ph.D., Department of Molecular Pathobiology, New York University, New York 10010, USA. [nwb2@nyu.edu](mailto:nwb2@nyu.edu)

Nicholas A Veldhuis, Monash Institute of Pharmaceutical Sciences, 381 Royal Parade, Parkville, VIC 3052, Australia. [nicholas.veldhuis@monash.edu](mailto:nicholas.veldhuis@monash.edu)

Michael R Whittaker, Monash Institute of Pharmaceutical Sciences, 381 Royal Parade, Parkville, VIC 3052, Australia. [michael.whittaker@monash.edu](mailto:michael.whittaker@monash.edu)

## SUPPLEMENTARY FIGURES

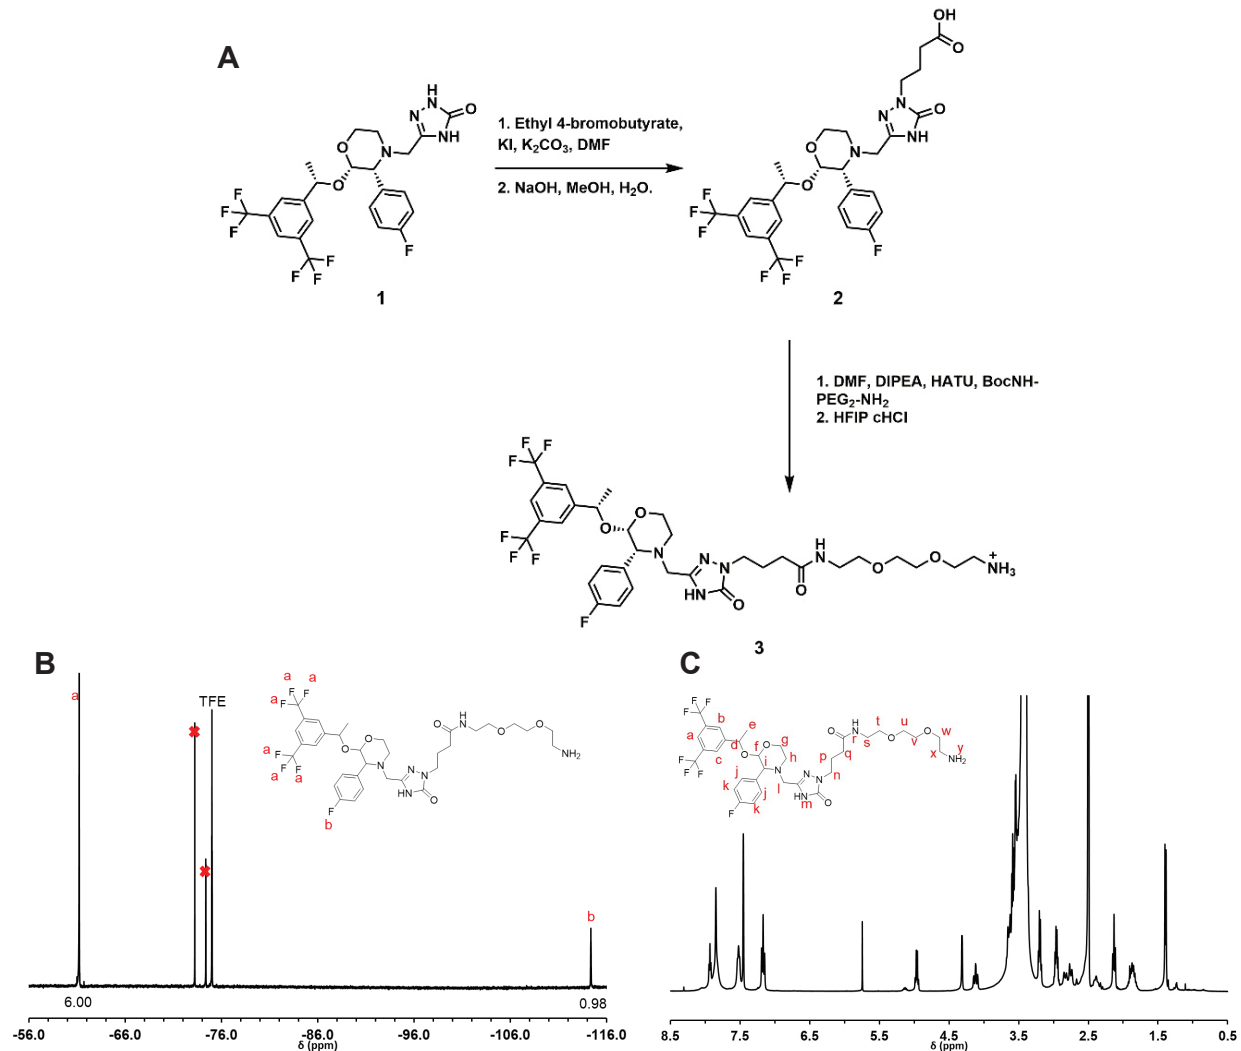

**Figure S1. Synthesis and characterization of AP-NH<sub>2</sub>.** **A.** Synthetic scheme. AP-NH<sub>2</sub> comprised a 3-carbon linker and primary amine for conjugation to nanostar linker. **B.** <sup>19</sup>F-NMR of the starting material AP-NH<sub>2</sub>. Red crosses (x) represent contaminant fluorine species in solution. **C.** <sup>1</sup>H-NMR of the starting material AP-NH<sub>2</sub>.

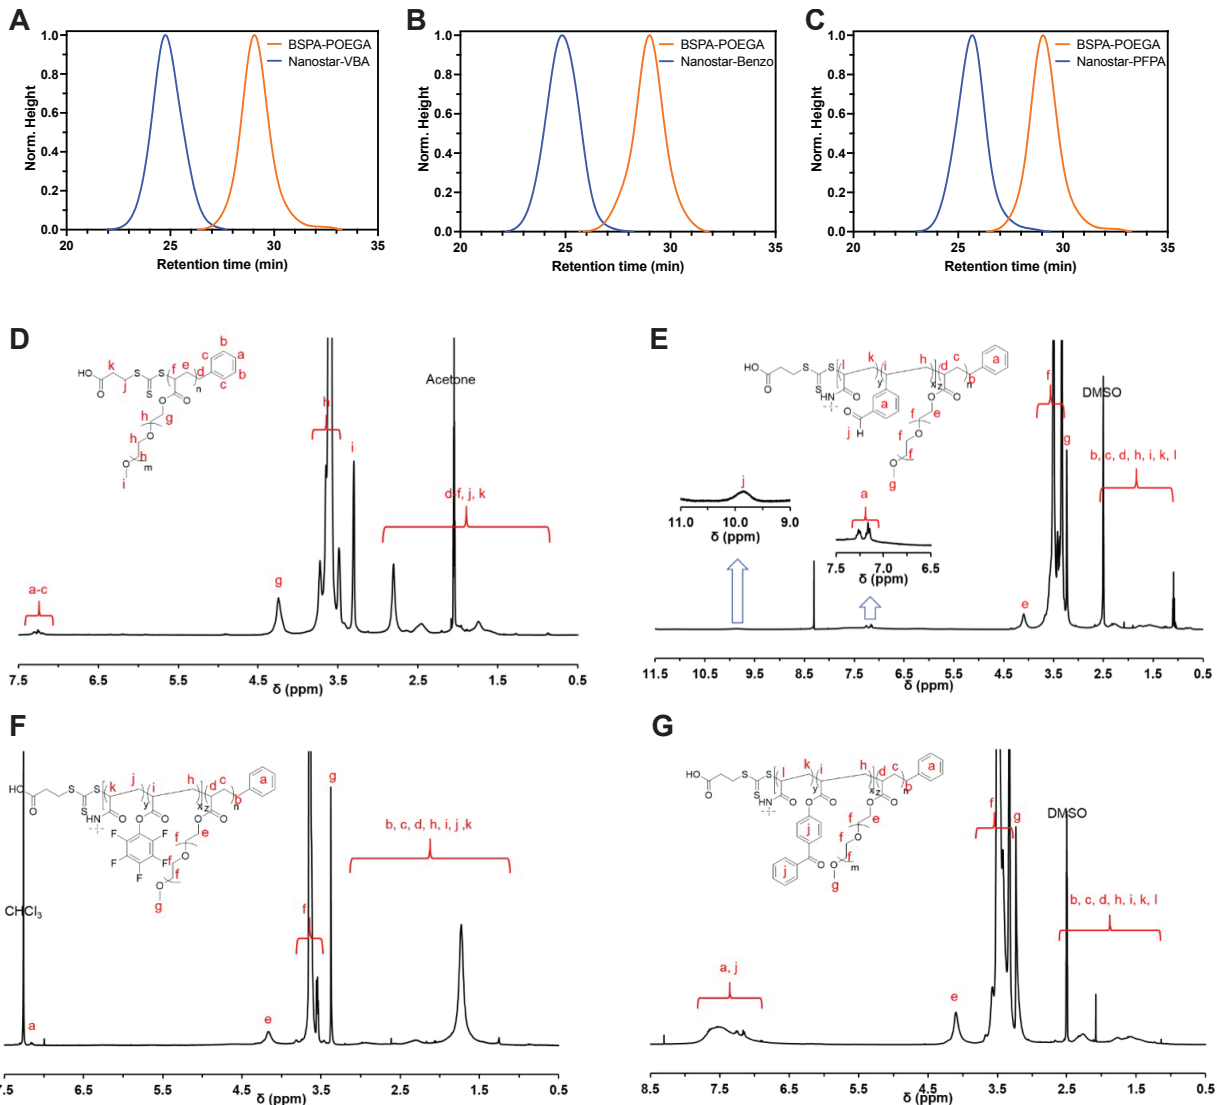

**Figure S2. Characterization of nanostars.** A-C. Evolution of molecular weight determined by GPC of the BSPA-POEGA arm polymer (orange) after star formation and purification (blue) with pentafluorophenyl acrylate (PFPA, A), 3-vinylbenzaldehyde (VBA, B) and 4-benzoylphenyl acrylate (Benzo, C). D-G. <sup>1</sup>H-NMR spectra of purified PEG arm (acetone-d<sub>6</sub>) (D), nanostar-PFPA (CDCl<sub>3</sub>) (E), nanostar-VBA (DMSO-d<sub>6</sub>) (F) and nanostar-Benzo (DMSO-d<sub>6</sub>) (G).

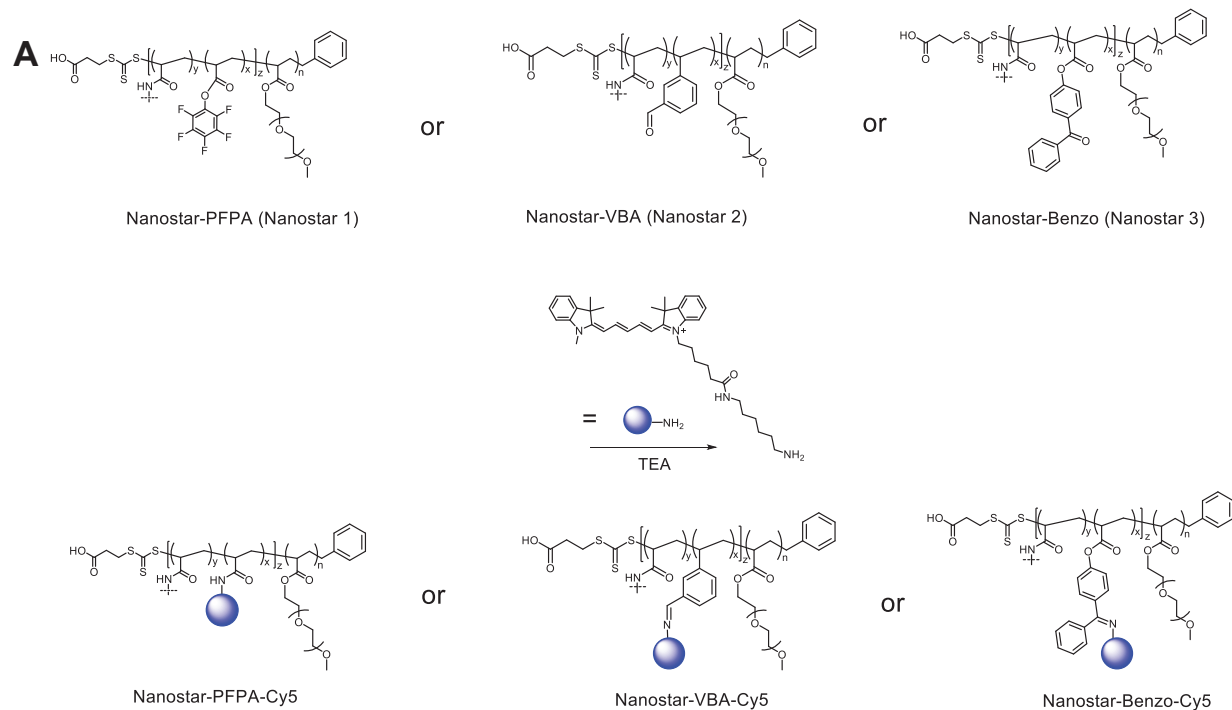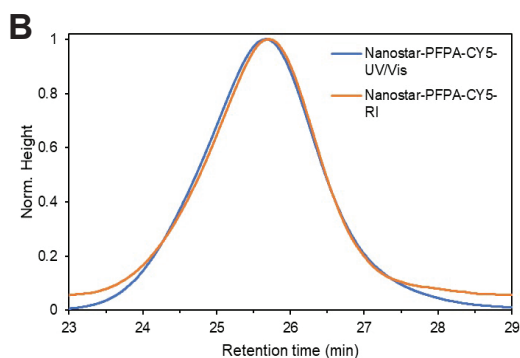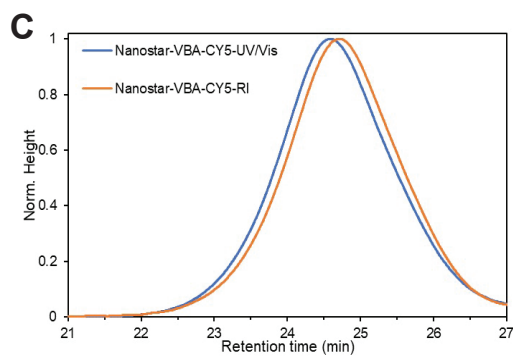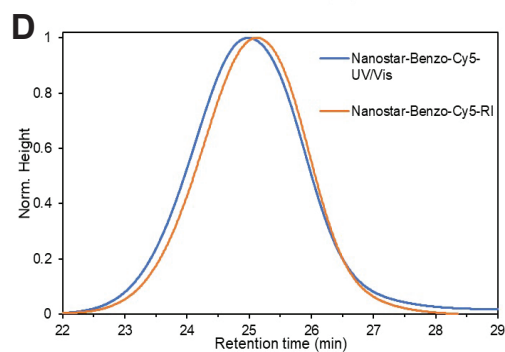

**Figure S3. Synthesis and characterization of Cy5-labeled nanostars.** **A.** Scheme for labeling of the nanostar polymers with Cy5-NH<sub>2</sub>. **B-D.** GPC chromatograms with dual UV-Vis ( $\lambda = 646$  nm, blue) and RI (orange) detection of nanostar-PFPA-Cy5 (**B**), nanostar-VBA-Cy5 (**C**) and nanostar-Benzo-Cy5 (**D**). Co-elution demonstrates effective labelling of the nanostars with Cy5. The slight shift in retention time for the UV-vis and dRI is due to arrangement of the detectors in series.

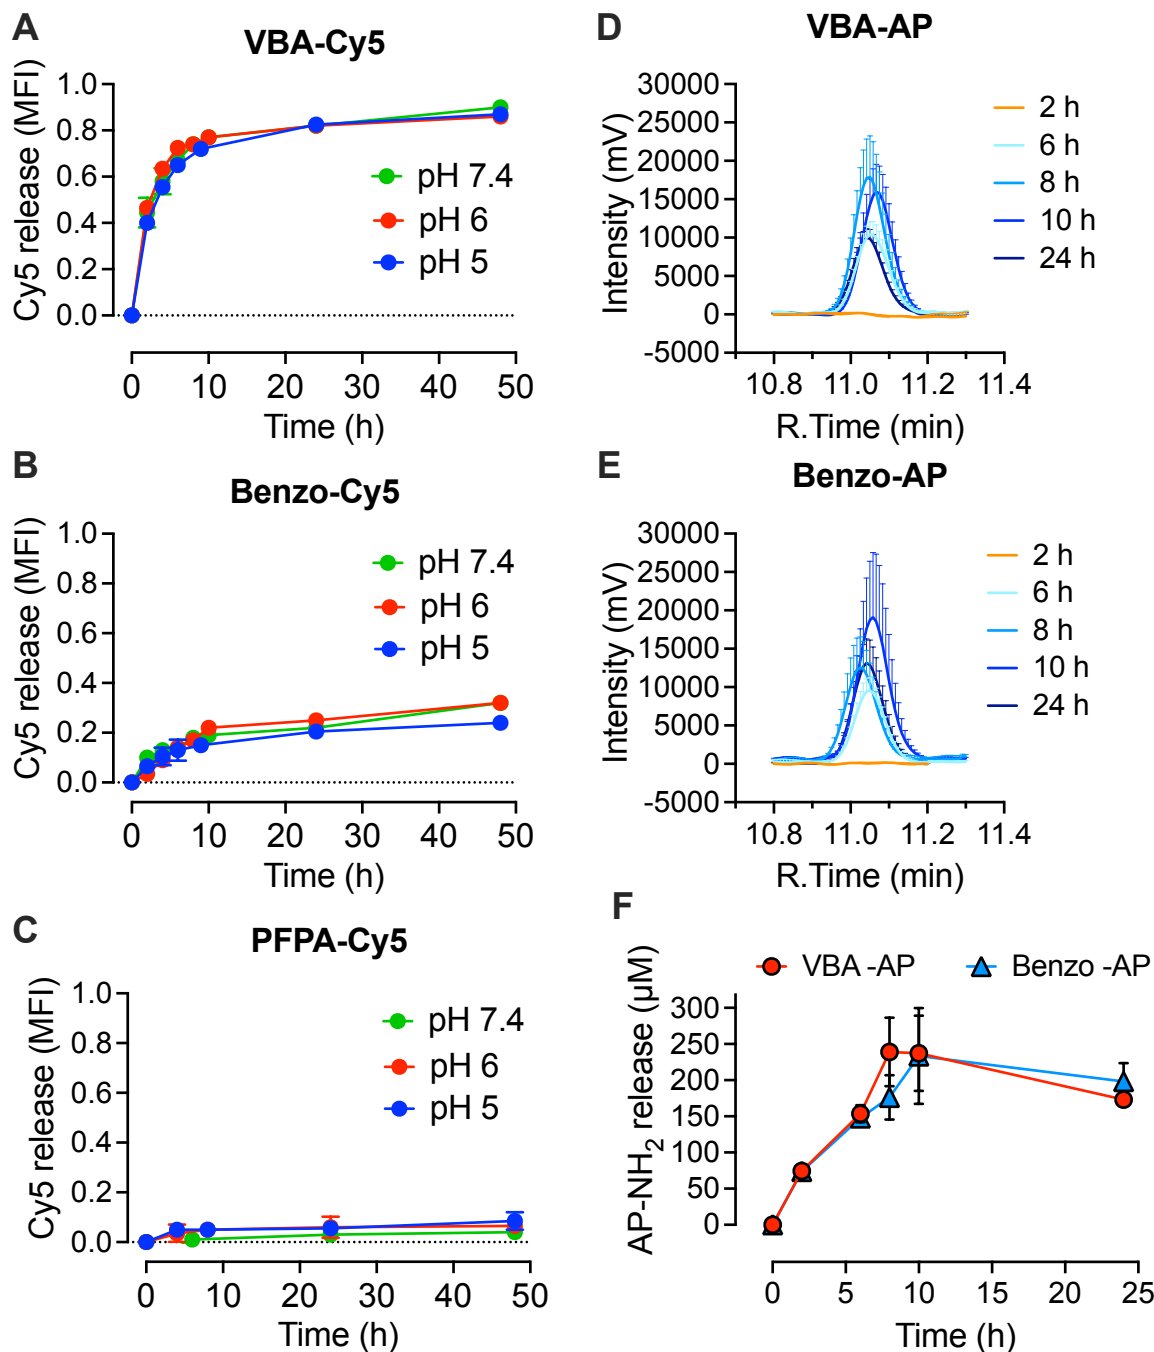

**Figure S4. Profiling linker stability by release of Cy5-NH<sub>2</sub> and AP-NH<sub>2</sub> from nanostar-Cy5 and nanostar-AP conjugates.** A-C. Release of Cy5-NH<sub>2</sub> was examined at pH 7.4, 6.0 or 5.0 over time. Cy5-NH<sub>2</sub> release was measured as mean fluorescence intensity (MFI,  $\lambda = 646$  nm) for VBA-Cy5 (A), Benzo-Cy5 (B) and PFPA-Cy5 (C). Mean  $\pm$  SD, N=2-3 independent experiments. D-F. Release of AP-NH<sub>2</sub> was examined at pH 7.4 over time. AP-NH<sub>2</sub> release was assessed by HPLC. Chromatograms for AP-NH<sub>2</sub> release after 2, 6, 8, 10 or 24 h from VBA-AP (D) and Benzo-AP (E). F shows time course of AP-NH<sub>2</sub> release. Mean  $\pm$  SE, N=3 independent experiments.

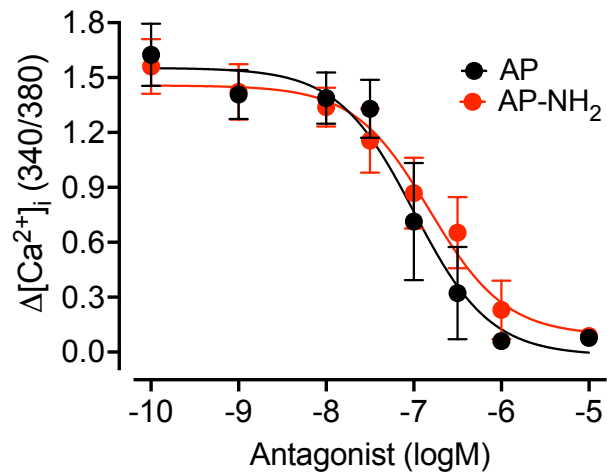

**Figure S5. Antagonistic activity of AP-NH<sub>2</sub> and AP.** Ca<sup>2+</sup> transients were measured in HEK-NK<sub>1</sub>R cells. Fura-2/AM loaded cells (2 μM, 45 min, 37°C, 5% CO<sub>2</sub>) were pre-incubated for 30 min with increasing concentrations of AP or AP-NH<sub>2</sub> before challenging cells with 10 nM SP (~EC<sub>80</sub>). Data presented as mean±SEM of N=4 independent experiments performed in triplicate.

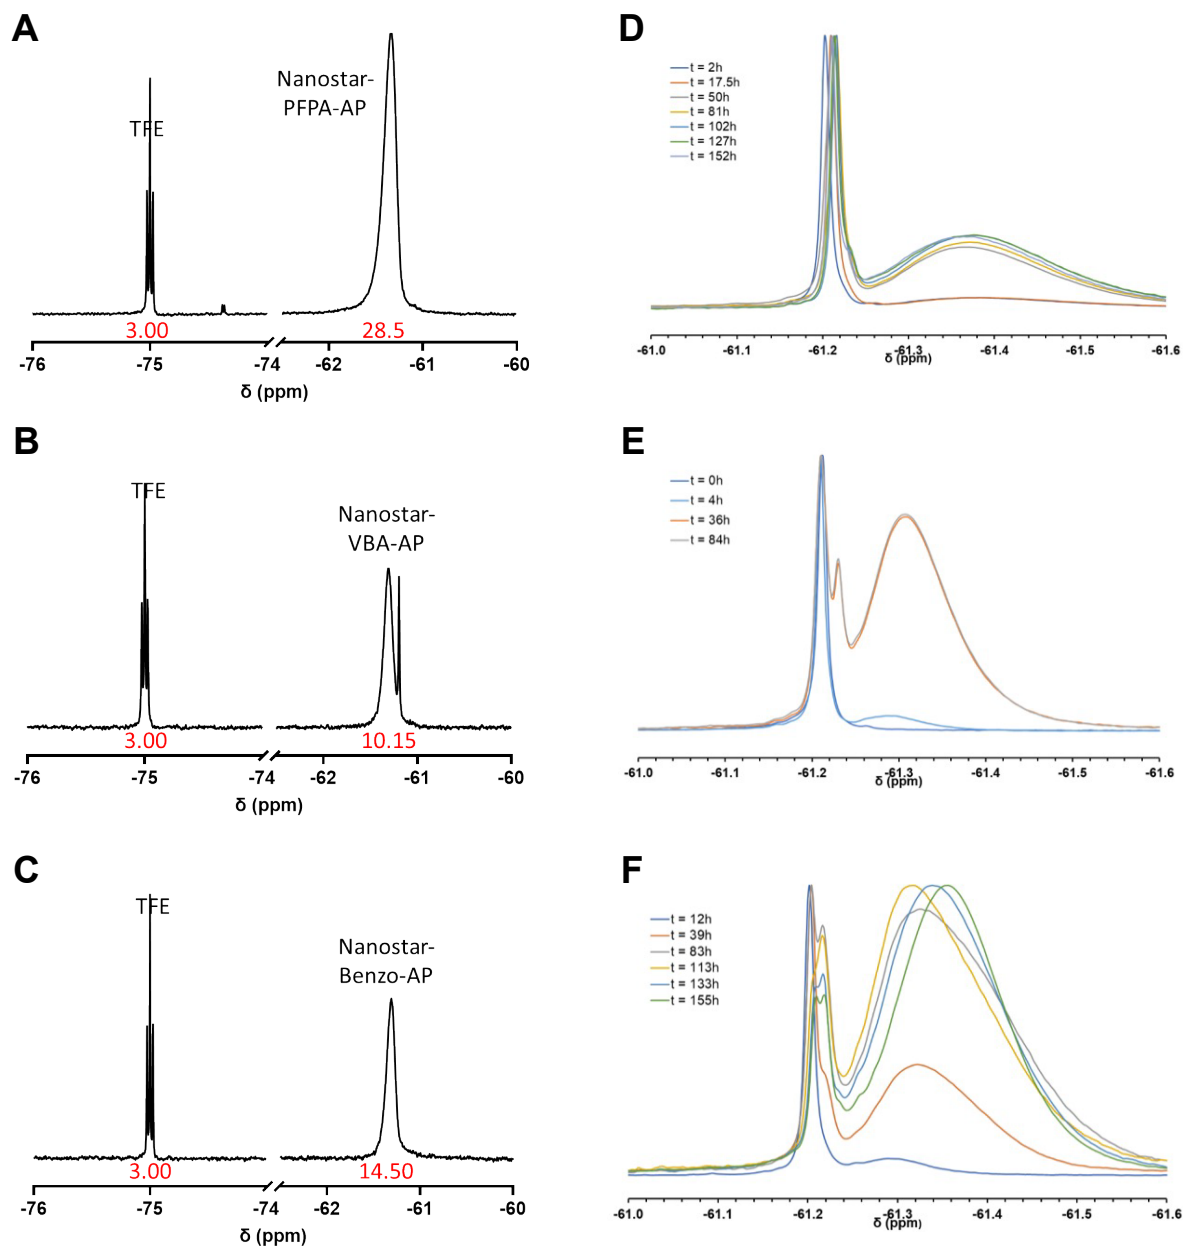

**Figure S6. AP conjugation and release from nanostars.** A-C.  $^{19}\text{F}$ -NMR spectra of the purified AP conjugated to PFPA-AP (A), VBA-AP (B) and Benzo-AP (C). TFE (0.6 mM) was added as a standard. Samples were analyzed in DMSO- $d_6$ . D-F. Kinetic study of incorporation of AP-NH<sub>2</sub> into nanostars was assessed by  $^{19}\text{F}$ -NMR spectra for PFPA-AP (D), VBA-AP (E) and Benzo-AP (F).

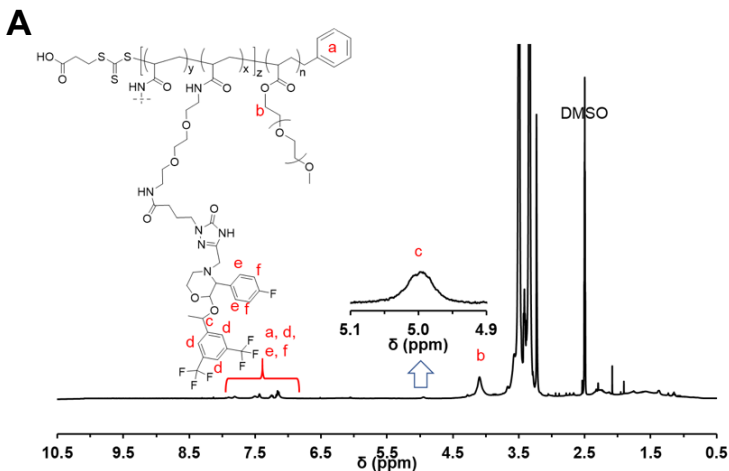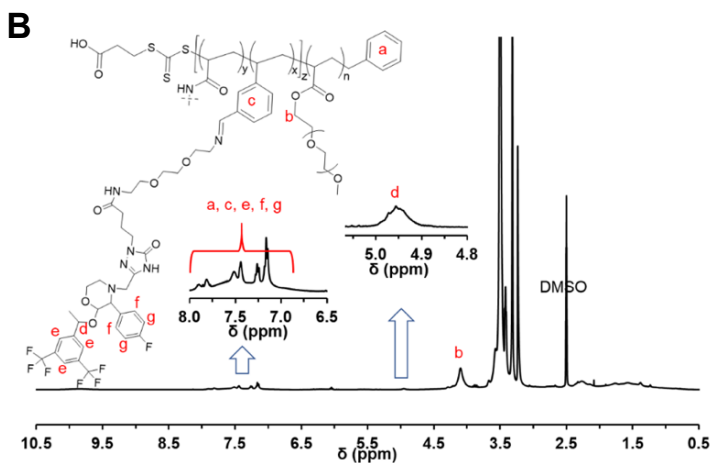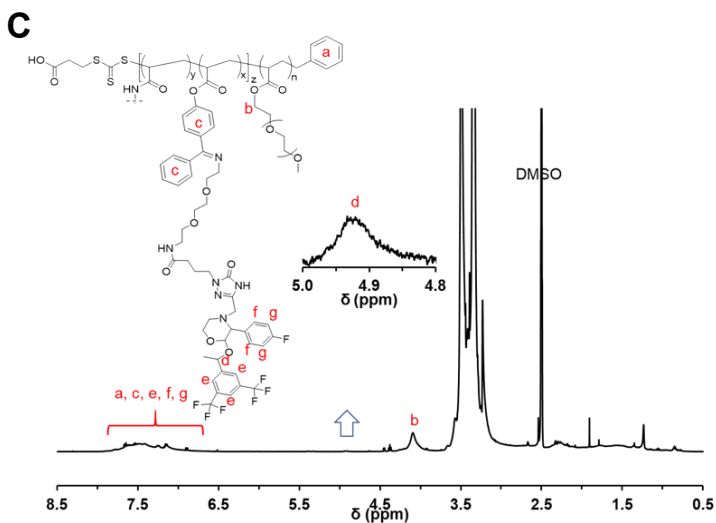

**Figure S7.  $^1\text{H-NMR}$  spectra of nanostars.** Purified nanostar-PFPA-AP (A), nanostar-VBA-AP (B) and nanostar-Benzo-AP (C) in DMSO- $d_6$ . Characteristic proton assignments arising from the nanostar polymer scaffold and conjugated drug (AP- $\text{NH}_2$ ) are shown.



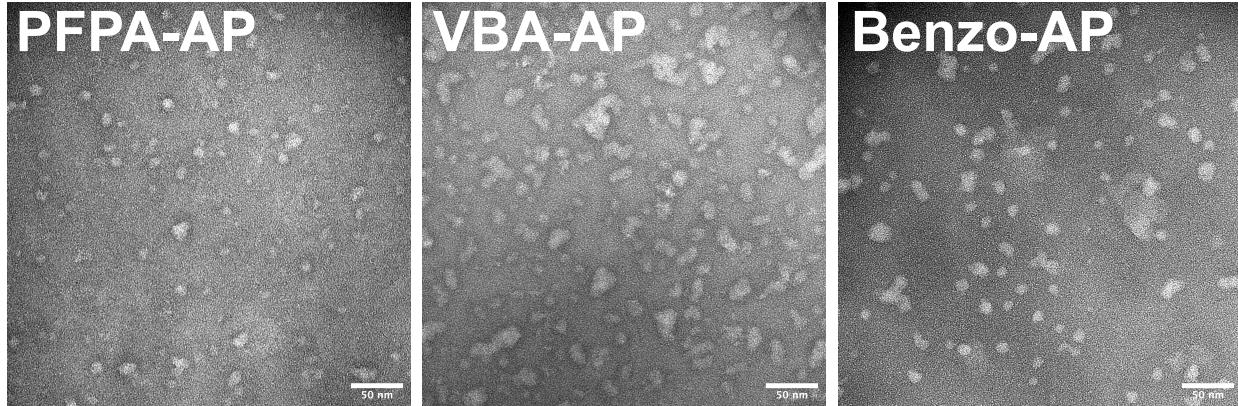

**Figure S8. TEM of nanostars.** Representative TEM images of PFPA, VBA and Benzo nanostars loaded with AP-NH<sub>2</sub>. Scale bar=50 nm.

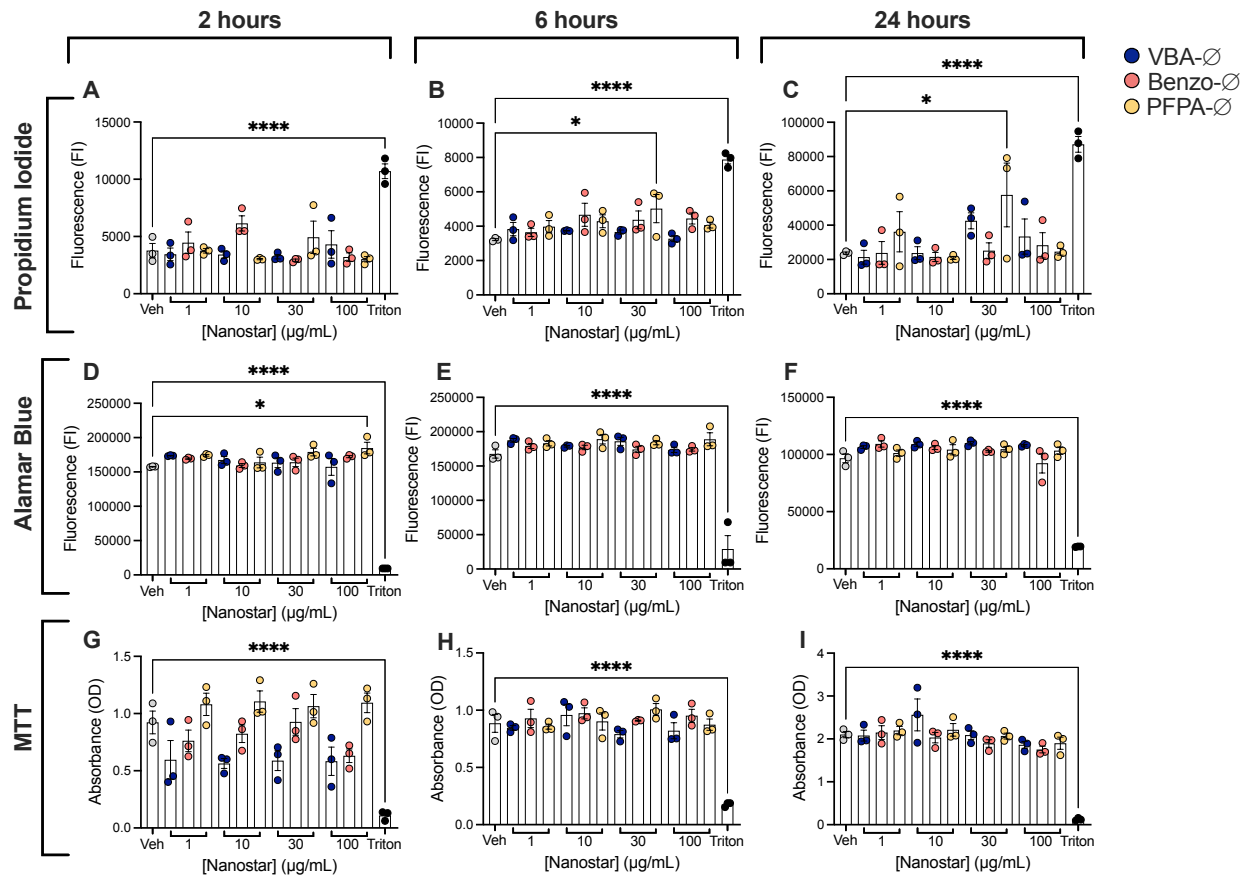

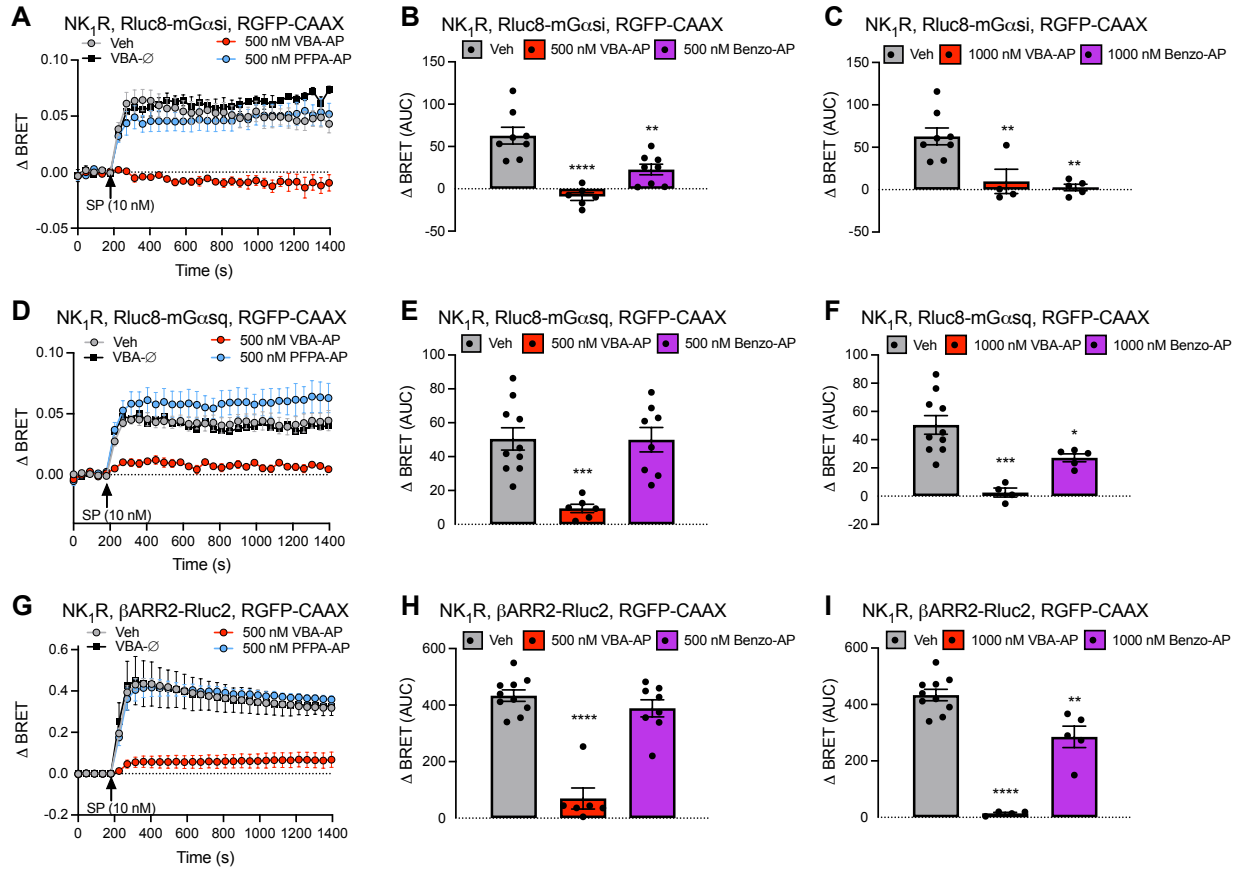

**Figure S10. Nanoparticles and plasma membrane NK<sub>1</sub>R signaling in HEK293T cells.** Effects of SP (10 nM) on EbBRET between Rluc8-mGα<sub>si</sub> (A, B, C), Rluc8-mGα<sub>sq</sub> (D, E, F) and βARR2-Rluc2 (G, H, I) with RGFP-CAAX. Cells were preincubated with vehicle (Veh, control), VBA-AP, Benzo-AP, PFPA-AP (500 nM AP loaded in nanoparticles: A, B, D, E, G, H; 1000 nM AP loaded in nanoparticles: C, F, I) or VBA-Ø for 4 h before stimulation with SP and measurement of EbBRET. A, D, G: time course of EbBRET prior and after SP (10 nM) stimulation. B, C, E, F, H, I: area under the curves (AUC) of corresponding time course of EbBRET. Mean±SEM. N=3-10 independent experiments. \*P<0.05, \*\*P<0.001, \*\*\*P<0.001, \*\*\*\*P<0.0001. One-way ANOVA, Dunnett's multiple comparisons test.

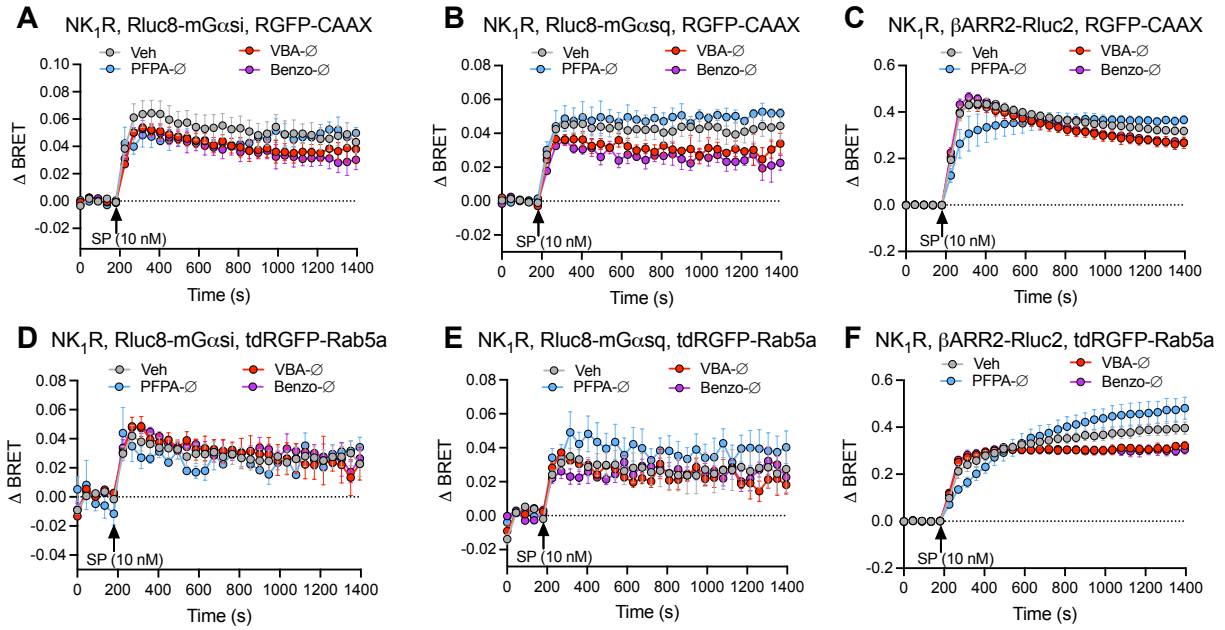

**Figure S11. Empty nanoparticles and NK<sub>1</sub>R signaling in HEK293T cells.** Effects of SP (10 nM) on EbBRET between Rluc8-mGα<sub>si</sub> (**A**, **D**), Rluc8-mGα<sub>sq</sub> (**B**, **E**) and βARR2-Rluc2 (**C**, **F**) with RGFP-CAAX (**A**, **B**, **C**) or tdRGFP-Rab5a (**D**, **E**, **F**). Cells were preincubated with vehicle (Veh), VBA-∅, Benzo-∅ or PFPA-∅ for 4 h before stimulation with SP and measurement of EbBRET. Curves represent time course of EbBRET prior and after SP (10 nM) stimulation. Mean±SEM. N=3-10 independent experiments.
